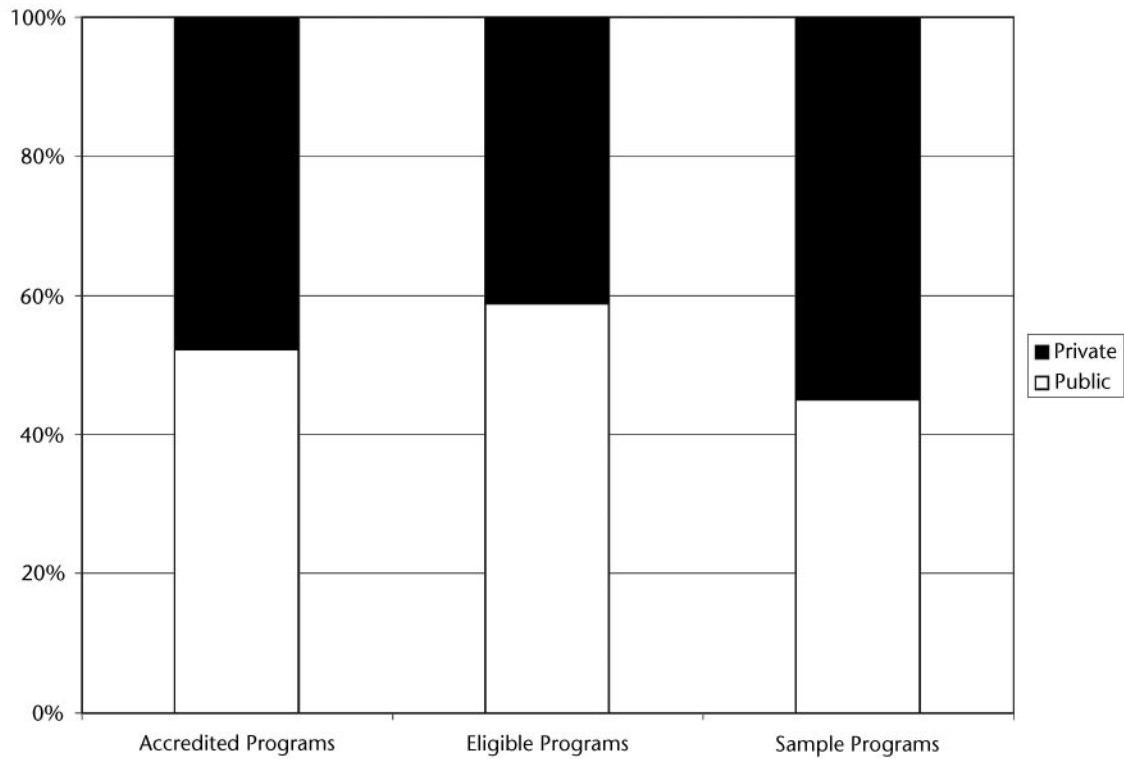

**Supplemental Figure 3.**

Institutional ownership of all accredited programs, programs eligible for the study, and programs in the sample.
