**Supplemental Table 3.**

Logistic Regression Odds and Decision Rule for Academic Difficulty, Program C<sup>a</sup>

| Predictor                                                            | $\beta$ | SE $\beta$ | Wald $\chi^2$                     | df                             | P     | Odds Ratio (95% CI) |
|----------------------------------------------------------------------|---------|------------|-----------------------------------|--------------------------------|-------|---------------------|
| uGPA 3.10 or lower                                                   | 1.335   | 0.438      | 9.290                             | 1                              | .002  | 3.801 (1.611–8.972) |
| qGRE 500 or lower                                                    | 1.045   | 0.426      | 6.010                             | 1                              | .014  | 2.843 (1.233–6.557) |
| Constant                                                             | –2.871  | 0.387      | 54.906                            | 1                              |       |                     |
| Test                                                                 |         |            | $\chi^2$                          | df                             | P     |                     |
| Overall model fit                                                    |         |            |                                   |                                |       |                     |
| Likelihood ratio test                                                |         |            | 17.799                            | 2                              | <.001 |                     |
| Goodness-of-fit tests                                                |         |            |                                   |                                |       |                     |
| Hosmer and Lemeshow                                                  |         |            | 1.247                             | 2                              | .536  |                     |
| Nagelkerke $r^2$                                                     | 0.148   |            |                                   |                                |       |                     |
| Decision Rule                                                        |         |            |                                   |                                |       |                     |
| +1.5 points for uGPA of 3.10 or lower, +1.0 for qGRE of 500 or lower |         |            |                                   |                                |       |                     |
| Score                                                                |         |            | No Difficulty Percentage (95% CI) | Difficulty Percentage (95% CI) |       |                     |
| 0 or 1                                                               |         |            | 92.8 (88.3–97.3)                  | 7.2 (2.7–11.7)                 |       |                     |
| 1.5 or 2.5                                                           |         |            | 75.6 (66.3–84.9)                  | 24.2 (15.1–33.7)               |       |                     |

<sup>a</sup> Sample size not reported to maintain anonymity of the program. SE=standard error, CI=confidence interval, uGPA=undergraduate grade point average, qGRE=quantitative Graduate Record Examination score.
